# Supplementary material
Source: Research Square preprint supplement (doi:10.21203/rs.3.rs-10368659/v1)
Supplement: Supplementary file 1 [file 65fa74fd9a8eae481ef999ef.xlsx]

## Sheet: Baseline
Author (Year)	Study Design	Country	Sample Size (n)	Mean Age (Range)	Reference Standard	Focus Area	Population Type
Mei-Dan 2009	Cohort study	Israel	47	27 years (16–32)	MRI	AITFL Rupture	Professional athletes
Lyu 2024	Prospective	China	51	39.2 years (15–72)	Arthroscopy	ATiFL-DF injury	Ankle fracture patients
Baltes 2021	Prospective	Qatar	70	Adults (>18 years)	3.0-T MRI	AITFL discontinuity	Adult athletes
Christodoulou 1995	Prospective	Greece	90	36.5 years (18–80)	Intraoperative findings	Interosseous membrane	Weber B and C ankle fractures
Lu 2023	Technical note	China	36	Not Reported	Intraoperative Stress Test	Syndesmotic stability	Ankle fracture surgery patients
McCarthy 2008	Retrospective	UK	17	34 (ALI); 30 (Control)	Arthroscopy	AITFL integrity	Elite footballers
Niekerk 2017	Prospective	South Africa	20	18–50 years	MRI & Surgery	Syndesmosis complex	Acute ankle injury patients

## Sheet: Data
Included Study	Target Condition	TP	FP	FN	TN	Analysis Subgroup
Baltes 2021	AITFL Discontinuity	23	0	0	47	Static POCUS
Christodoulou 1995	Interosseous Rupture	31	3	4	52	Static POCUS
Lu 2023	Syndesmotic Instability	12	1	2	21	Dynamic Intraoperative
Lyu 2024	ATiFL-DF Injury	39	4	6	2	Static POCUS
McCarthy 2008	AITFL Rupture	2	0	0	15	Static POCUS
Mei-Dan 2009	AITFL Rupture	9	0	0	38	Dynamic Stress US
